# Supplementary material for: An insight into triel bonds in O,O′-diarylphosphorodithioates of thallium(i): experimental and theoretical investigations
Source: Royal Society of Chemistry journal article supplement (doi:10.1039/d1nj04852j), 2021-11-29
Supplement: d1nj04852j1.pdf [file d1nj04852j1.pdf]

### Elementary Supporting Information

#### **An insight into triel bonds in *O,O'*-diarylphosphorodithioates of thallium(I): Experimental and theoretical investigations**

Tahira Firdoos,<sup>a</sup> Pretam Kumar,<sup>a</sup> Anu Radha,<sup>a</sup> Rosa M. Gomila,<sup>b</sup> Antonio Frontera,<sup>b</sup> Puneet Sood<sup>c</sup> and Sushil K. Pandey<sup>\*a</sup>

<sup>a</sup>*Post Graduate Department of Chemistry, University of Jammu, Baba Saheb Ambedkar Road, Jammu Tawi-180006, J&K, India*

<sup>b</sup>*Departament de Química, Universitat de les Illes Balears, Crta de Valldemossa km 7.5, 07122 Palma de Mallorca (Balears), Spain*

<sup>c</sup>*Advanced Materials Research Center, Block-A2 Building, Kamand Campus, Indian Institute of Technology, Mandi, Himachal Pradesh-175005, India.*

*\*Email: [kpsushil@rediffmail.com](mailto:kpsushil@rediffmail.com)*

**Table S1** Crystallographic parameter for compounds **1** and **2**

| <b>Compound</b>      | <b>1</b>                                                          | <b>2</b>                                                          |
|----------------------|-------------------------------------------------------------------|-------------------------------------------------------------------|
| CCDC                 | 2109341                                                           | 2109342                                                           |
| Chemical formula     | C <sub>16</sub> H <sub>18</sub> O <sub>2</sub> PS <sub>2</sub> Tl | C <sub>18</sub> H <sub>22</sub> O <sub>2</sub> PS <sub>2</sub> Tl |
| <i>M<sub>r</sub></i> | 541.81                                                            | 569.82                                                            |
| Crystal system       | Monoclinic                                                        | Triclinic                                                         |
| Space group          | <i>P</i> 2 <sub>1</sub> / <i>c</i>                                | <i>P</i> <sup>-</sup> 1                                           |
| <i>a</i> (Å)         | 10.9662 (3)                                                       | 8.4373 (8)                                                        |
| <i>b</i> (Å)         | 11.3253 (4)                                                       | 9.6672 (9)                                                        |
| <i>c</i> (Å)         | 14.7907 (4)                                                       | 12.6725 (19)                                                      |

|                                                                            |                                       |                                       |
|----------------------------------------------------------------------------|---------------------------------------|---------------------------------------|
| $\alpha$ (°)                                                               | 90                                    | 107.092 (11)                          |
| $\beta$ (°)                                                                | 100.286 (3)                           | 95.785 (10)                           |
| $\gamma$ (°)                                                               | 90                                    | 90.443 (8)                            |
| $V$ (Å <sup>3</sup> )                                                      | 1807.42 (10)                          | 982.2 (2)                             |
| $Z$                                                                        | 4                                     | 2                                     |
| $\mu$ (mm <sup>-1</sup> )                                                  | 9.26                                  | 8.52                                  |
| Crystal size (mm)                                                          | 0.26 × 0.2 × 0.14                     | 0.18 × 0.08 × 0.06                    |
| Data collection                                                            |                                       |                                       |
| Diffractometer                                                             | SuperNova, Dual, Cu at home/near, Eos | SuperNova, Dual, Cu at home/near, Eos |
| $T_{\min}$ , $T_{\max}$                                                    | 0.278, 0.578                          | 0.496, 1.000                          |
| No. of measured, independent and observed reflections                      | 5950, 3894, 3154 [ $I \geq 2u(I)$ ]   | 5647, 4026, 3316 [ $I > 2\sigma(I)$ ] |
| $R_{\text{int}}$                                                           | 0.048                                 | 0.108                                 |
| $(\sin \theta/\lambda)_{\text{max}}$ (Å <sup>-1</sup> )                    | 0.668                                 | 0.668                                 |
| Refinement                                                                 |                                       |                                       |
| $R[F^2 > 2\sigma(F^2)]$ , $wR(F^2)$ , $S$                                  | 0.045, 0.123, 1.00                    | 0.089, 0.222, 1.05                    |
| No. of reflections                                                         | 3894                                  | 4026                                  |
| No. of parameters                                                          | 201                                   | 221                                   |
| $\Delta\rho_{\text{max}}$ , $\Delta\rho_{\text{min}}$ (e Å <sup>-3</sup> ) | 1.64, -1.28                           | 4.81, -3.11                           |

---

**Table S2** Selected bond lengths of complexes **1** and **2** (Å)

| <b>Complex 1</b> |             | <b>Complex 2</b>    |            |
|------------------|-------------|---------------------|------------|
| Tl1—S21          | 3.0648 (18) | Tl2—S2              | 2.986 (4)  |
| Tl1—S22          | 3.169 (2)   | Tl2—S4 <sup>i</sup> | 3.110 (4)  |
| S21—P9           | 1.971 (3)   | S2—P5               | 1.957 (5)  |
| S22—P9           | 1.970 (3)   | S4—Tl2 <sup>i</sup> | 3.110 (4)  |
| P9—O8            | 1.615 (5)   | S4—P5               | 1.973 (5)  |
| P9—O10           | 1.605 (5)   | P5—O3               | 1.634 (11) |
| O8—C2            | 1.384 (8)   | P5—O10              | 1.621 (11) |
| O10—C11          | 1.405 (9)   | O3—C24              | 1.388 (17) |
|                  |             | O10—C33             | 1.377 (17) |

Symmetry code(s): (i)  $-x, -y+1, -z+1$ .

**Table S3** Selected bond angles of complexes **1** and **2** (°)

| <b>Complex 1</b> |             | <b>Complex 2</b>       |             |
|------------------|-------------|------------------------|-------------|
| S22—Tl1—S21      | 63.78 (5)   | S2—Tl2—S4 <sup>i</sup> | 87.65 (11)  |
| P9—S21—Tl1       | 86.58 (8)   | P5—S2—Tl2              | 88.57 (18)  |
| P9—S22—Tl1       | 83.71 (8)   | P5—S4—Tl2 <sup>i</sup> | 109.84 (19) |
| S22—P9—S21       | 113.43 (12) | S2—P5—S4               | 116.4 (2)   |
| O8—P9—S21        | 111.6 (2)   | O3—P5—S2               | 112.5 (5)   |

|             |           |             |            |
|-------------|-----------|-------------|------------|
| O8—P9—S22   | 111.8 (2) | O3—P5—S4    | 110.9 (4)  |
| O10—P9—S21  | 113.6 (2) | O10—P5—S2   | 111.2 (4)  |
| O10—P9—S22  | 111.6 (2) | O10—P5—S4   | 111.3 (5)  |
| O10—P9—O8   | 93.2 (3)  | O10—P5—O3   | 92.0 (6)   |
| C2—O8—P9    | 120.1 (4) | C24—O3—P5   | 122.1 (9)  |
| C11—O10—P9  | 120.5 (4) | C33—O10—P5  | 125.6 (9)  |
| C3—C2—O8    | 119.8 (6) | C1AA—C24—O3 | 117.9 (13) |
| C7—C2—O8    | 119.3 (7) | C20—C24—O3  | 120.1 (13) |
| C12—C11—O10 | 120.8 (7) | O10—C33—C26 | 123.2 (13) |
| C16—C11—O10 | 118.2 (7) | O10—C33—C30 | 116.7 (14) |

Symmetry code(s): (i)  $-x, -y+1, -z+1$ .

---

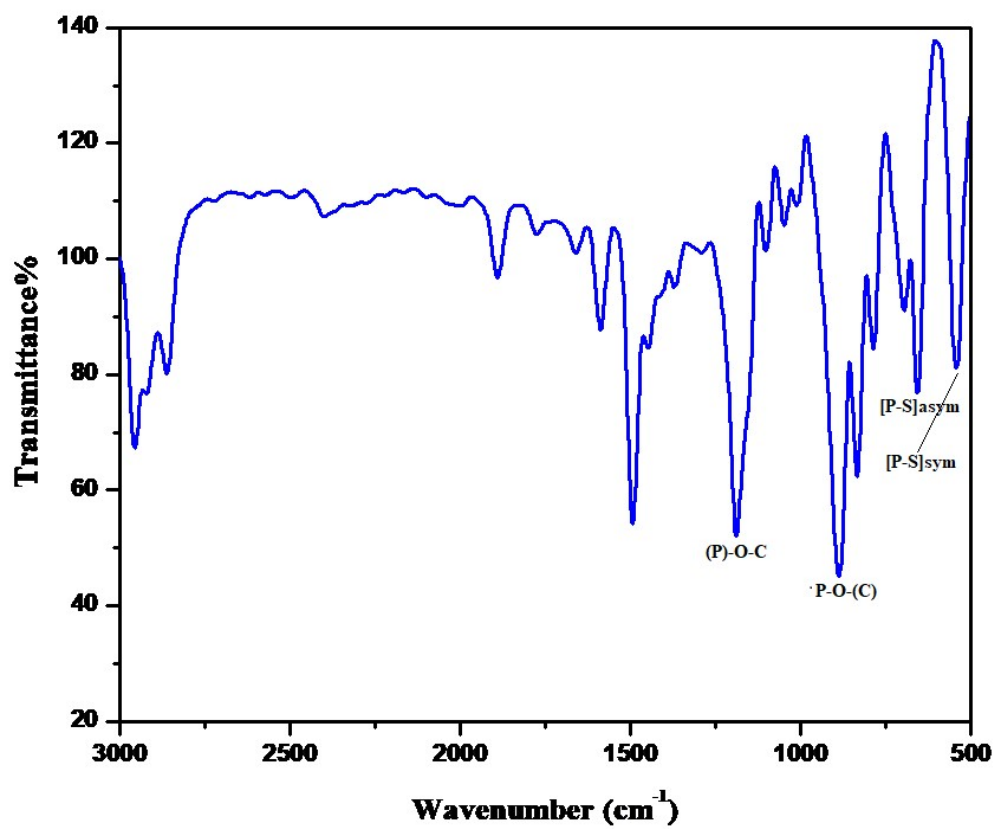

Fig. S1 FTIR spectra of Compound 1

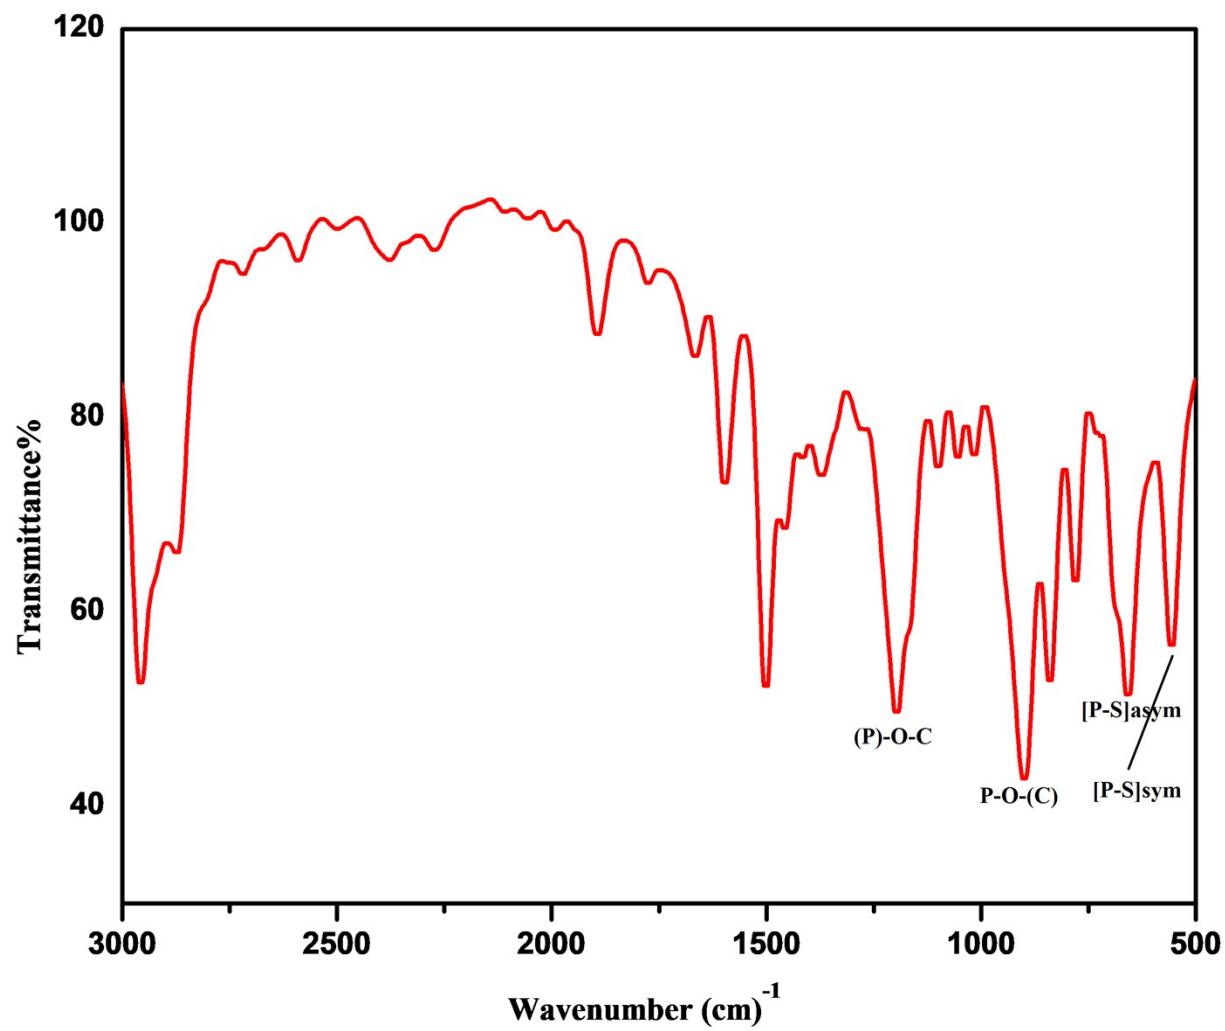

Fig. S2 FTIR spectra of Compound 2

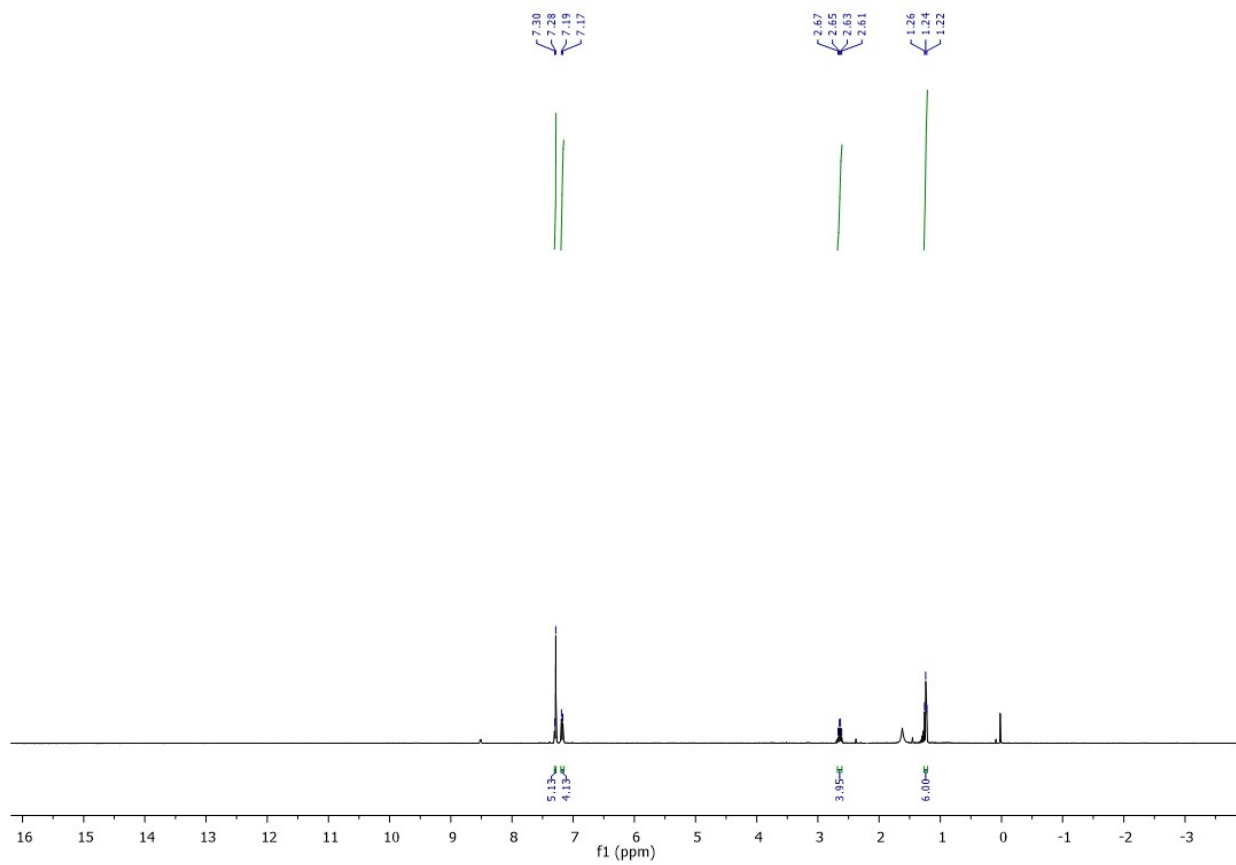

**Fig. S3**  $^1\text{H}$  NMR spectra of Compound 1 ( $\text{CDCl}_3$ )

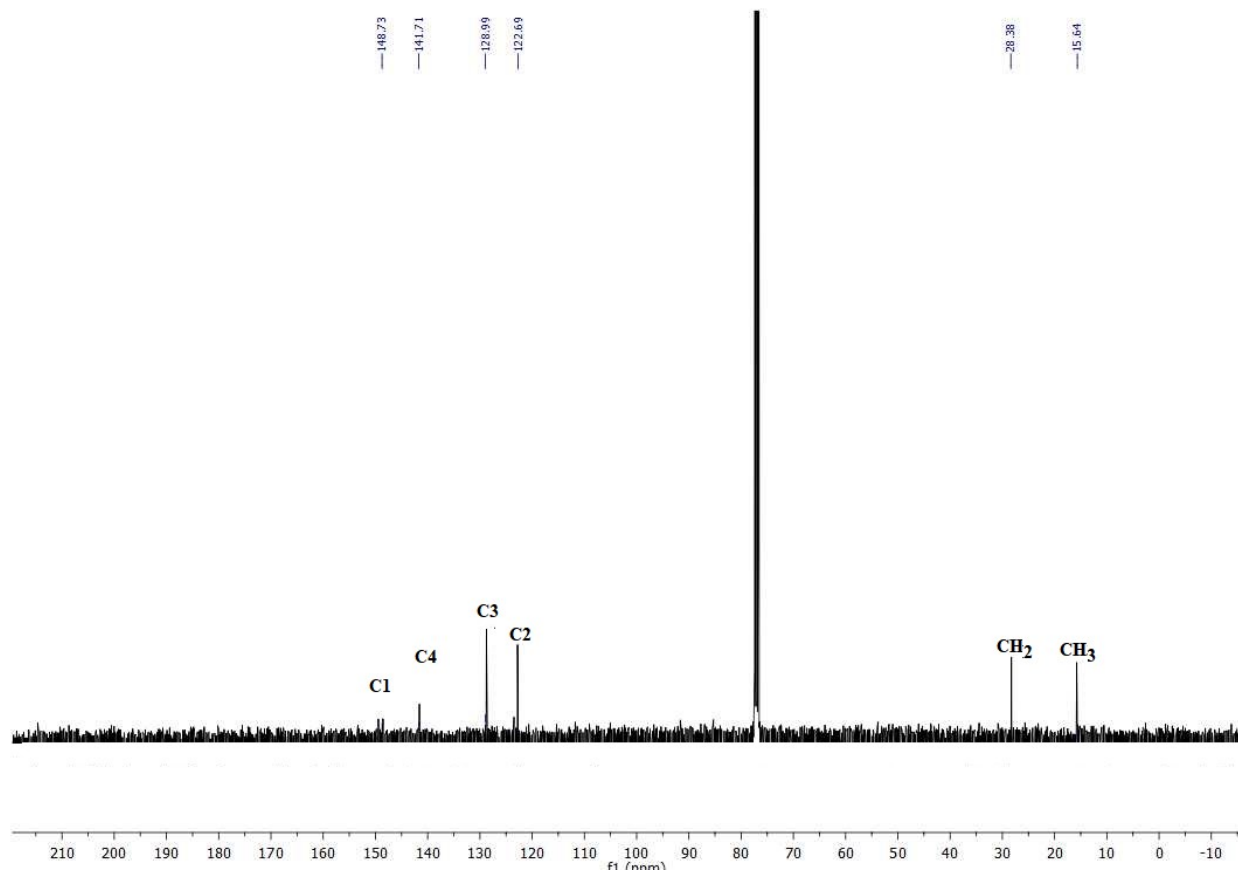

**Fig. S4**  $^{13}\text{C}$  NMR spectra of Compound 1 ( $\text{CDCl}_3$ )



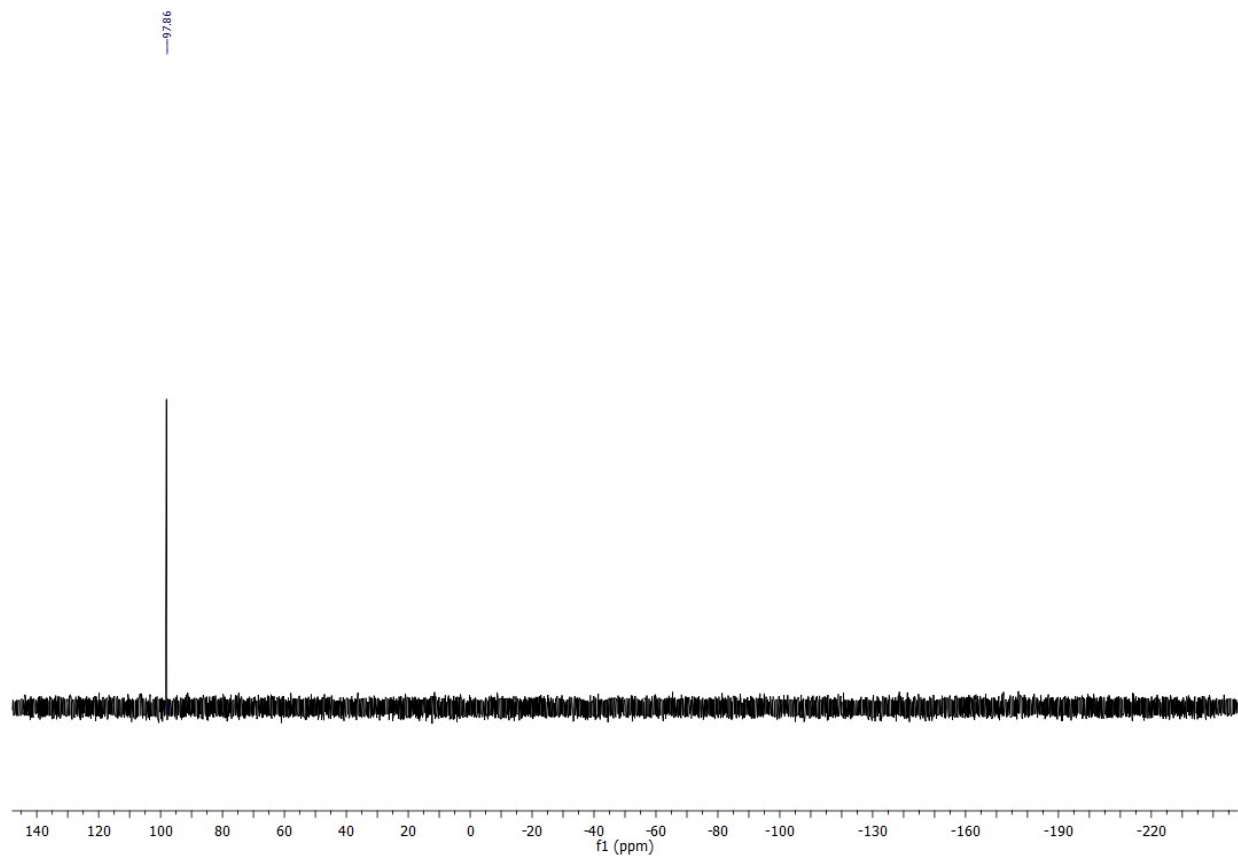

**Fig. S5**  $^{31}\text{P}$  NMR spectra of Compound **1** ( $\text{CDCl}_3$ )

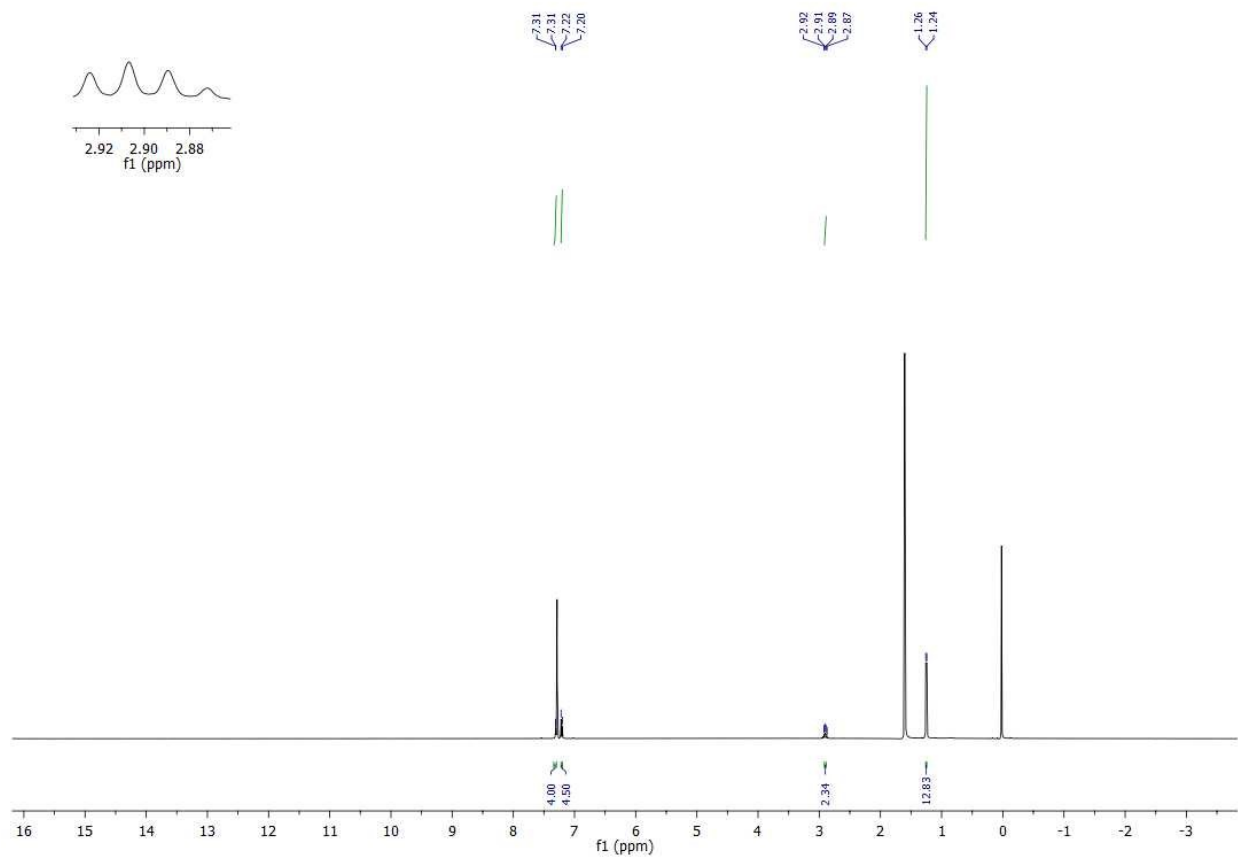

**Fig. S6**  $^1\text{H}$  NMR spectra of Compound 2 ( $\text{CDCl}_3$ )

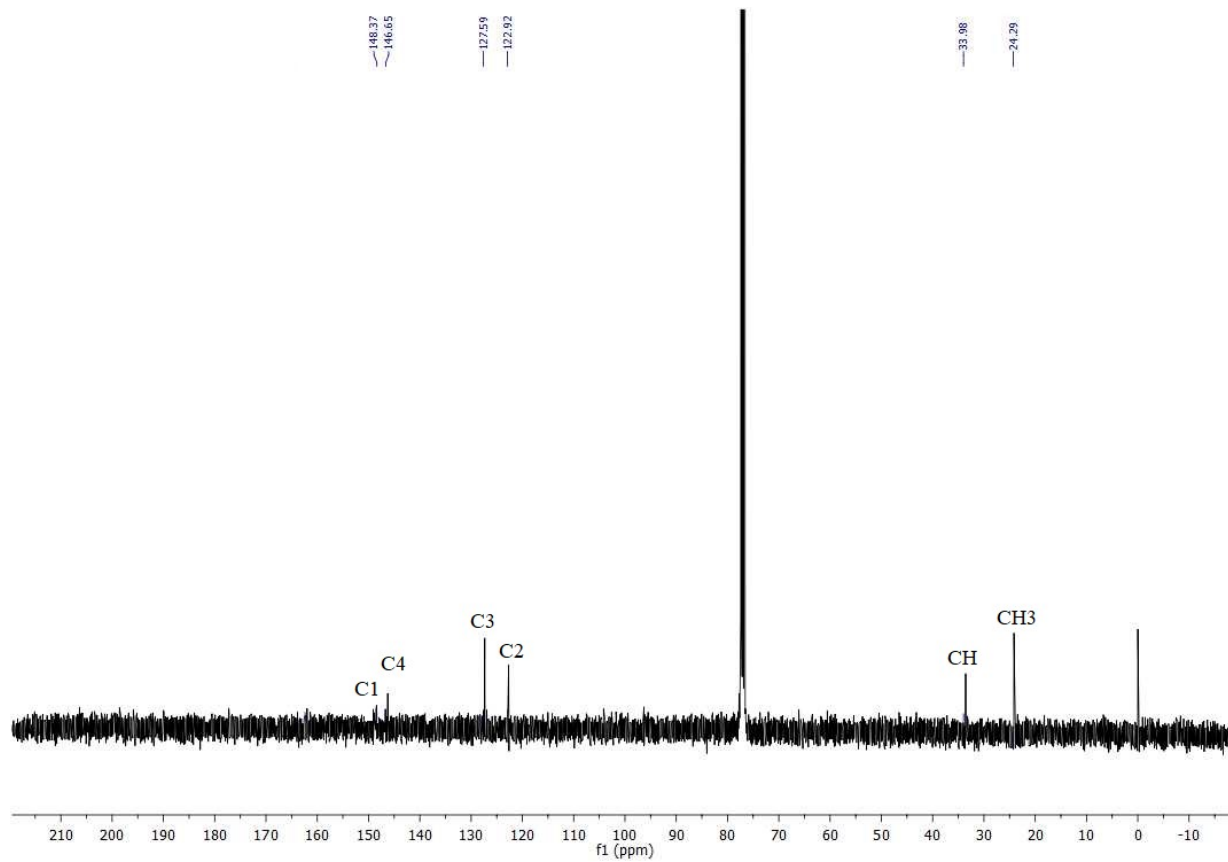

**Fig. S7**  $^{13}\text{C}$  NMR spectra of Compound 1 ( $\text{CDCl}_3$ )

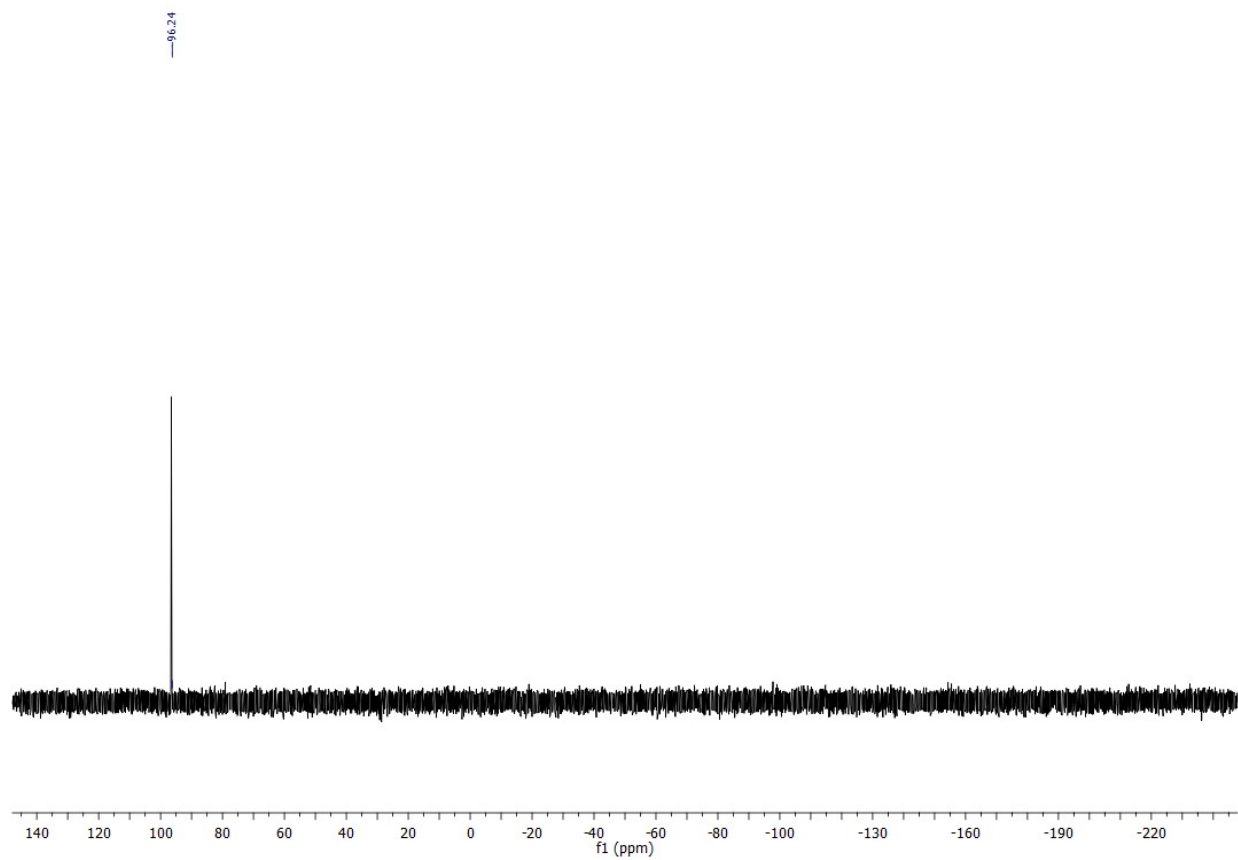

Fig. S8  $^{31}\text{P}$  NMR spectra of Compound **2** ( $\text{CDCl}_3$ )

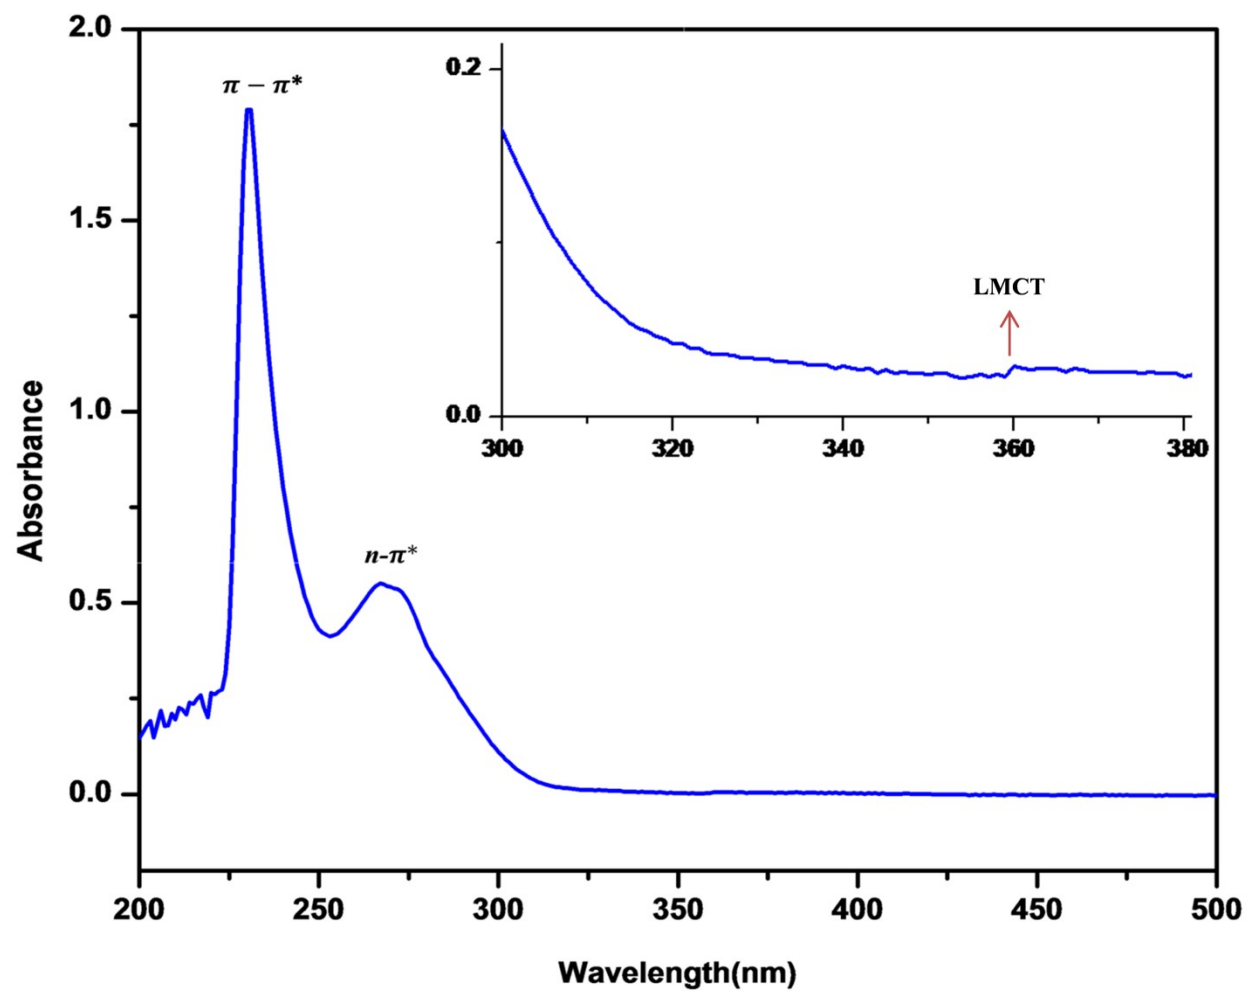

Fig. S9 UV-Vis spectra of Compound 1

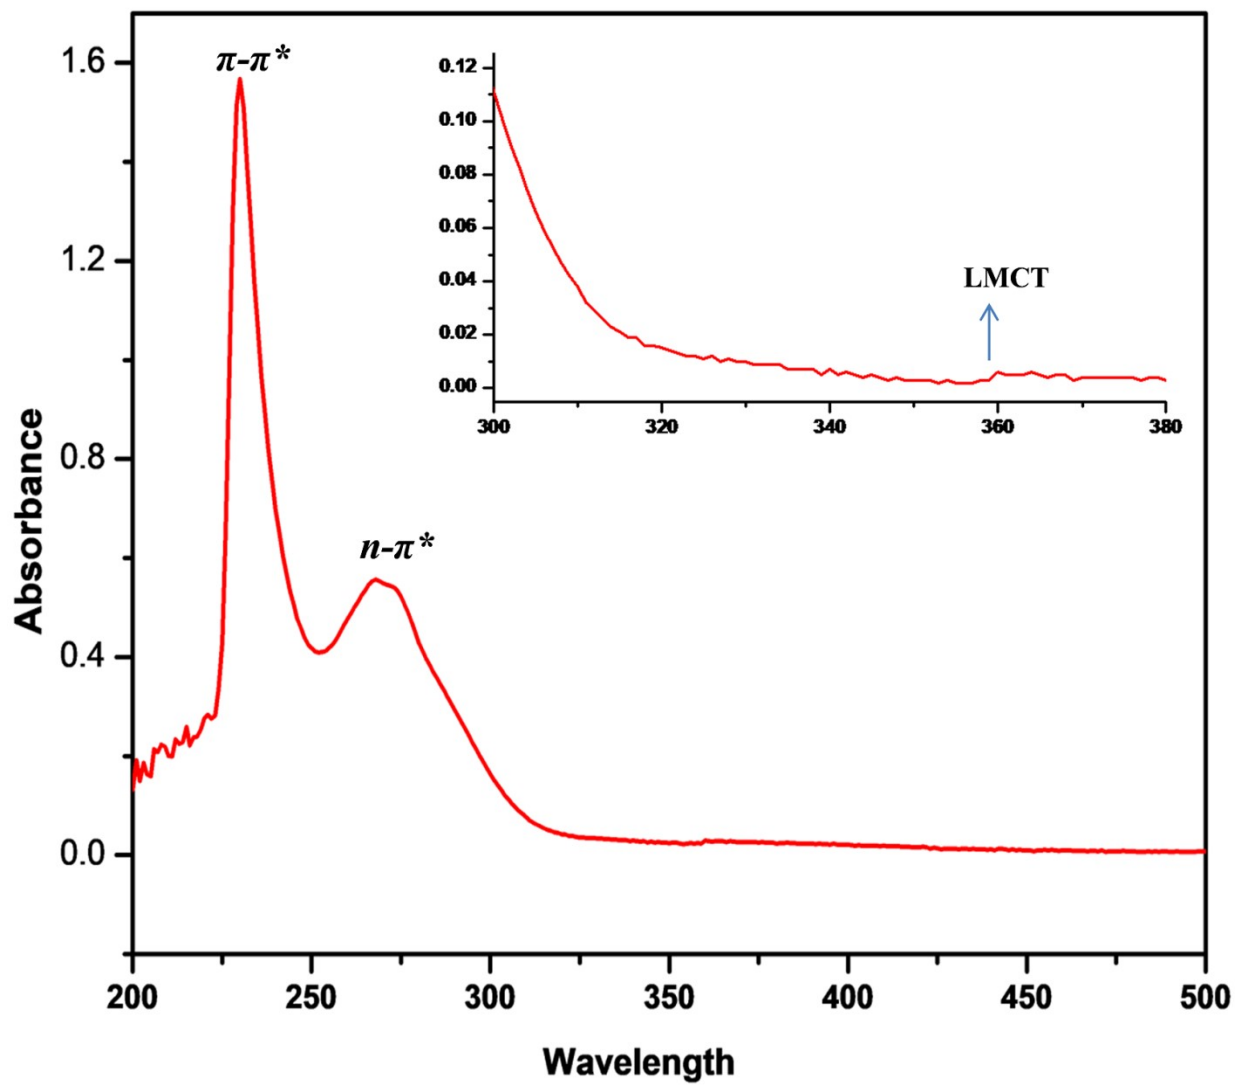

Fig. S10 UV-Vis spectra of Compound 2

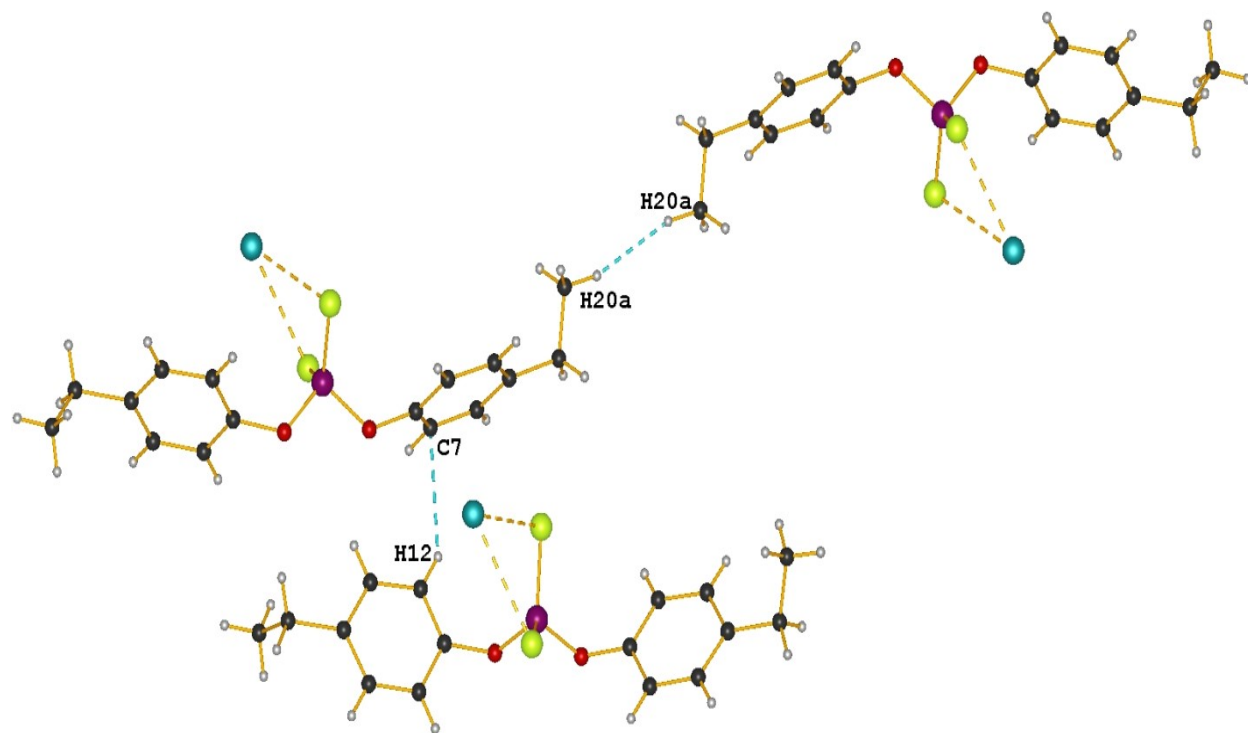

**Fig. S11** Supramolecular motif of compound **1** generated through C $\cdots$ H and H $\cdots$ H interactions.

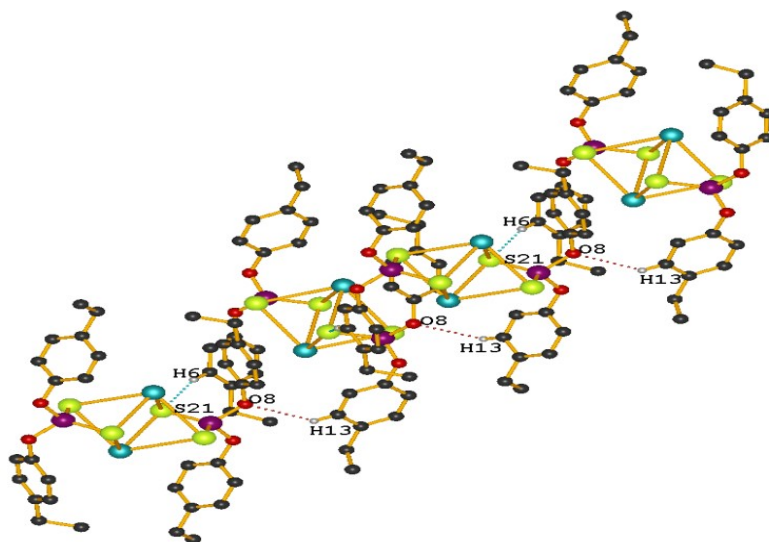

**Fig. S12** Polymeric chain of compound **1** generated through intermolecular O $\cdots$ H and S $\cdots$ H interactions. Only the relevant hydrogen atoms are shown for clarity. Symmetry transformation

for  $H\cdots O = x, 1.5 - y, -1/2 + z$  where  $H13\cdots O8 = 2.57 \text{ \AA}$  and symmetry transformation for  $H\cdots S = 1 - x, -1/2 + y, 1/2 - z$  where  $H6\cdots S21 = 2.98 \text{ \AA}$ .

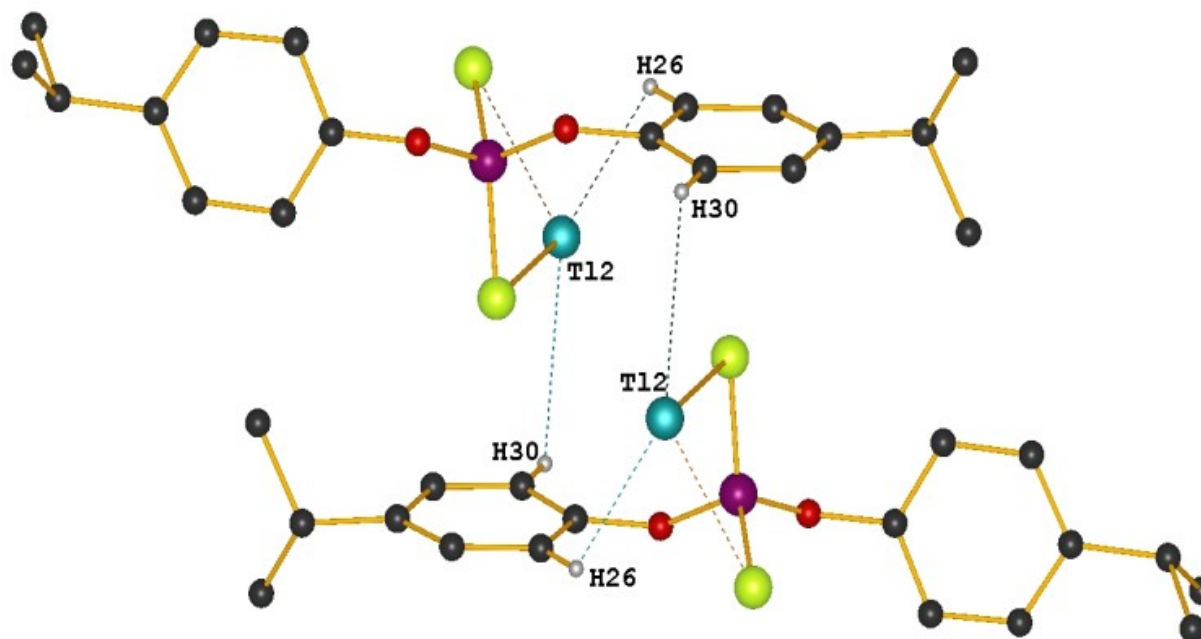

**Fig. S13** Supramolecular dimer of compound **2** generated through anagostic C–H...Tl anagostic interactions. Only the relevant Hydrogen atoms are shown for clarity. Symmetry transformation  $= x, y, z$  where  $C-H26\cdots Tl2 = 3.30 \text{ \AA}$ .



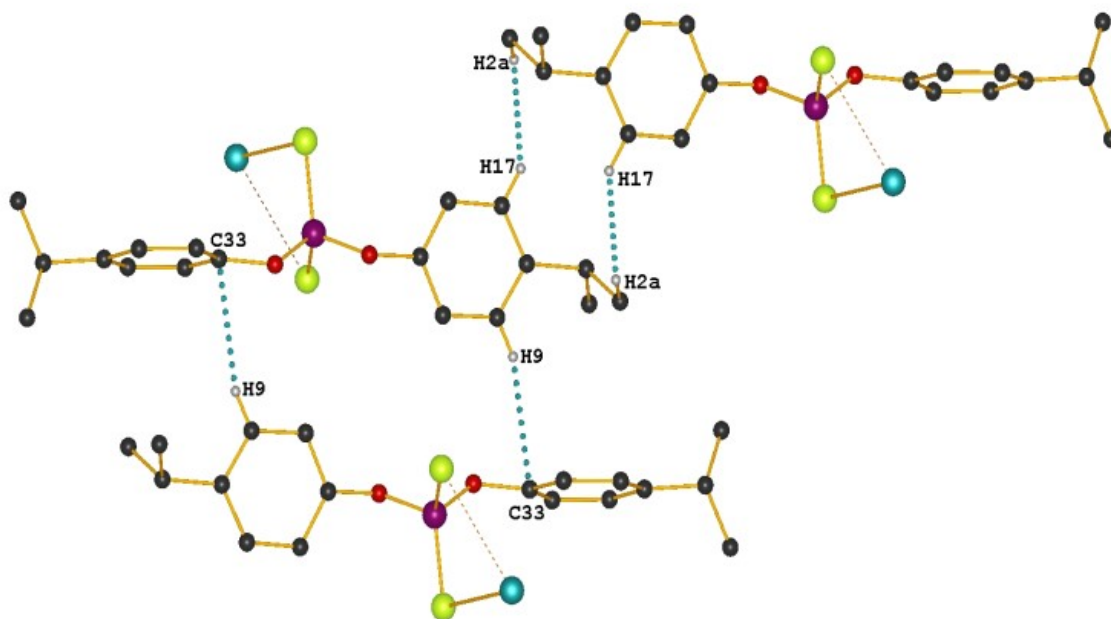

**Fig. S14** Supramolecular dimer of compound **2** generated via C···H and H···H interactions. Symmetry transformation =  $1 - x, 1 - y, 1 - z$  with H9···C33 = 2.82 Å.

**Table S4** QTAIM parameters (a.u.) measured at the bond critical points (CP) labelled in Figs. 12 and 13 for the TI···S contacts in compounds **1** and **2**.

| BCP               | $\rho_r$ | $\nabla^2\rho_r$ | $V_r$   | $G_r$  | $H_r$   |
|-------------------|----------|------------------|---------|--------|---------|
| <b>Compound 1</b> |          |                  |         |        |         |
| <b>a</b>          | 0.0262   | 0.0555           | -0.0159 | 0.0149 | -0.0010 |
| <b>b</b>          | 0.0216   | 0.0468           | -0.0121 | 0.0119 | -0.0002 |
| <b>c</b>          | 0.0144   | 0.0322           | -0.0068 | 0.0074 | 0.0062  |
| <b>d</b>          | 0.0207   | 0.0444           | -0.0112 | 0.0112 | 0.0000  |
| <b>Compound 2</b> |          |                  |         |        |         |
| <b>a</b>          | 0.0303   | 0.0620           | -0.0195 | 0.0175 | -0.0020 |
| <b>b</b>          | 0.0208   | 0.0450           | -0.0114 | 0.0113 | -0.0001 |
| <b>c</b>          | 0.0231   | 0.0496           | -0.0131 | 0.0127 | -0.0004 |
| <b>d</b>          | 0.0110   | 0.0239           | -0.0045 | 0.0052 | 0.0007  |
